# Supplementary material for: Reduced graphene oxide anchored with zinc oxide nanoparticles with enhanced photocatalytic activity and gas sensing properties
Source: Royal Society of Chemistry journal article supplement (doi:10.1039/c4ra12707b), 2014-01-01
Supplement: c4ra12707b1.pdf [file c4ra12707b1.pdf]

## Supporting Information for

### Reduced graphene oxide anchored with zinc oxide nanoparticles with enhanced photocatalytic activity and gas sensing property

Jianjiang He<sup>a</sup>, Chungu Niu<sup>b</sup>, Chao Yang<sup>a</sup>, Jide Wang<sup>a</sup>, Xintai Su<sup>a\*</sup>,

Table S1 BET surface areas of rGO-ZnO composites were determined from nitrogen adsorption measurements.

| Samples                              | rGO-ZnO-1 | rGO-ZnO-2 | rGO-ZnO-3 | rGO-ZnO-4 | rGO-ZnO-5 |
|--------------------------------------|-----------|-----------|-----------|-----------|-----------|
| BET surface area (m <sup>2</sup> /g) | 165       | 225       | 161       | 164       | 114       |

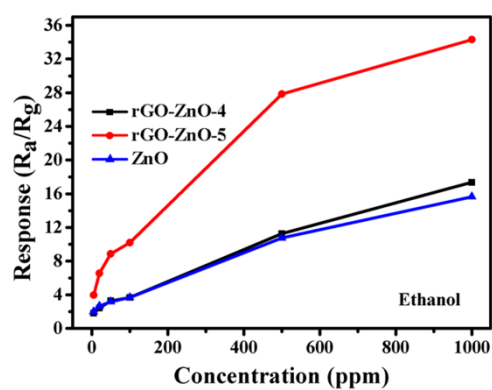

Fig. S1 The average sensor responses of rGO-ZnO based sensors toward to ethanol at different concentrations.
